# Supplementary material
Source: PubMed Central journal article supplement (PMC2763181)
Supplement: NIHMS150483-supplement-supplement_1.pdf [file NIHMS150483-supplement-supplement_1.pdf]

## SUPPLEMENTAL FIGURE LEGENDS

**Figure S1.** Proteome analysis comparing protein profiles of wild-type 81-176 and mutant 81-176*cj0415*. Although the downstream *cj0415* gene was insertionally inactivated, both the Cj0415 and Cj0414 proteins are missing in the *cj0415* mutant.

**Figure S2.** GADH activity of *C. jejuni* 81-176 cell fractions. *C. jejuni* 81-176 cells grown at 42°C were fractionated as described (Myers & Kelly, 2005), and the presence of GADH activity was determined by a coupled enzyme assay. The samples were total membranes (M), cytoplasm (C), periplasm (P), whole cells (WC), or no cell lysate (N) as a negative control.

**Figure S3.** Growth at 42°C of *C. jejuni* 81-176 supplemented with electron donors. Growth of *C. jejuni* in defined  $\alpha$ MEM media containing the electron donors gluconate and formate was monitored by optical density at 600 nm. Electron donors added were: 5 mM formate (open circles), 20 mM D-gluconate (open squares), or no added electron donor (open diamonds). Cultures were inoculated at initial OD<sub>600</sub> of approximately 0.02 (left panel), 0.06 (center panel), or 0.1 (right panel). Addition of electron donors did not stimulate *C. jejuni* growth.

**Figure S4.** *In vitro* growth profiles of 81-176 and 81-176*cj0415*. Wild-type and *cj0415* mutant strains were grown individually or mixed in equal concentration prior to inoculation; growth of the three cultures was monitored by OD<sub>600</sub> (Panel A) and by viable count of the *in vitro* competition (Panel B). Results showed no differences in the growth of the strains either individually or during *in vitro* competition.

**Figure S1**

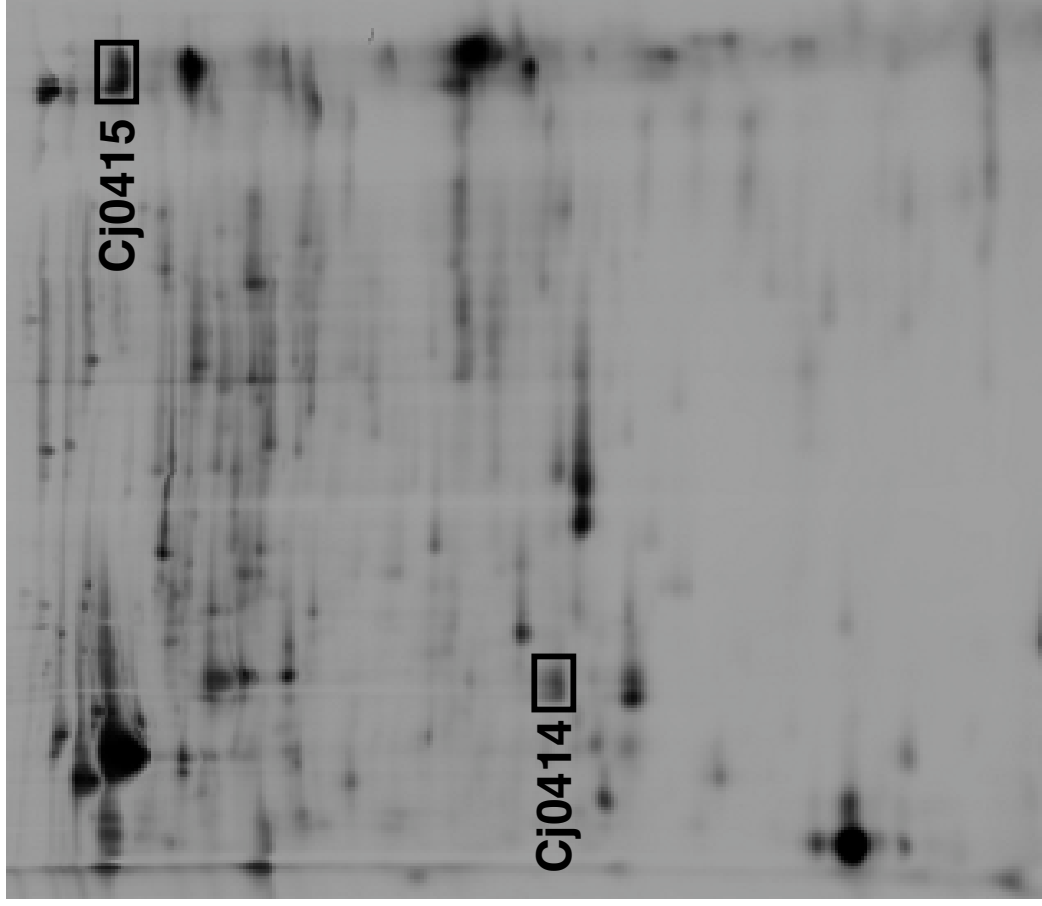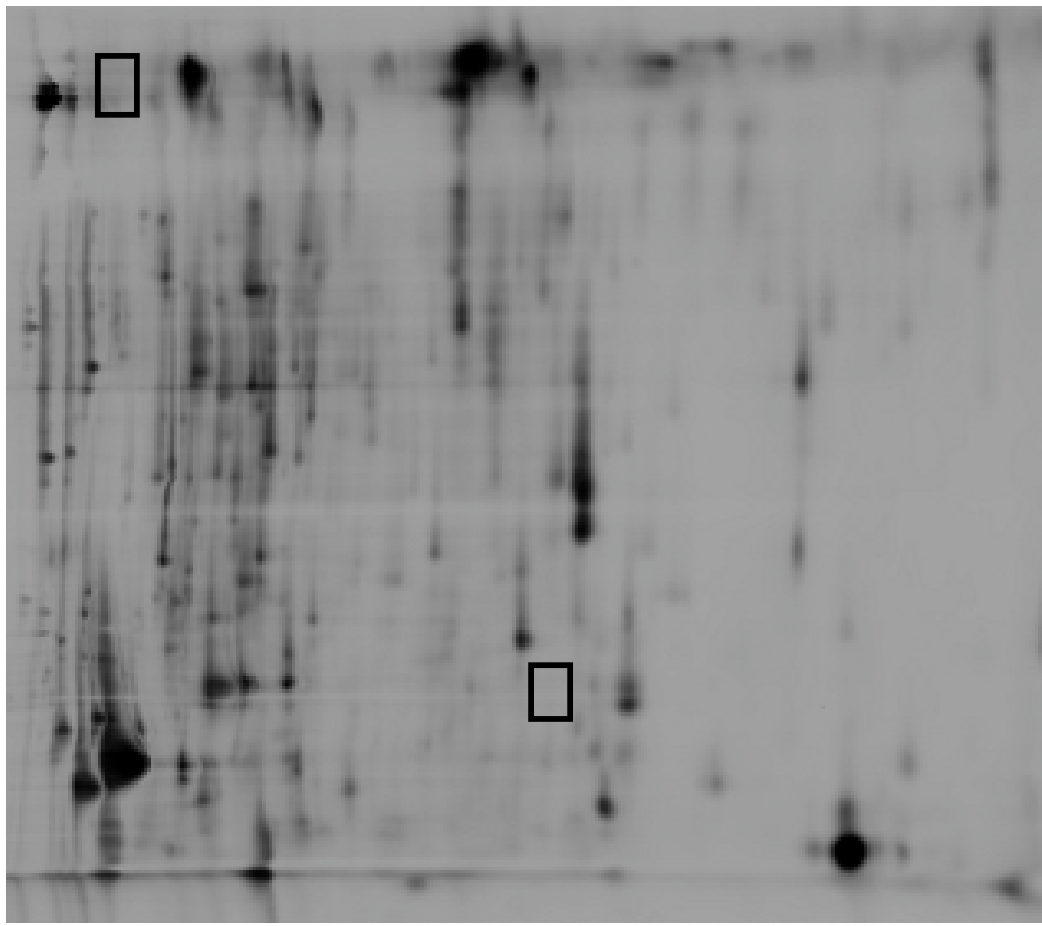

**Figure S2**

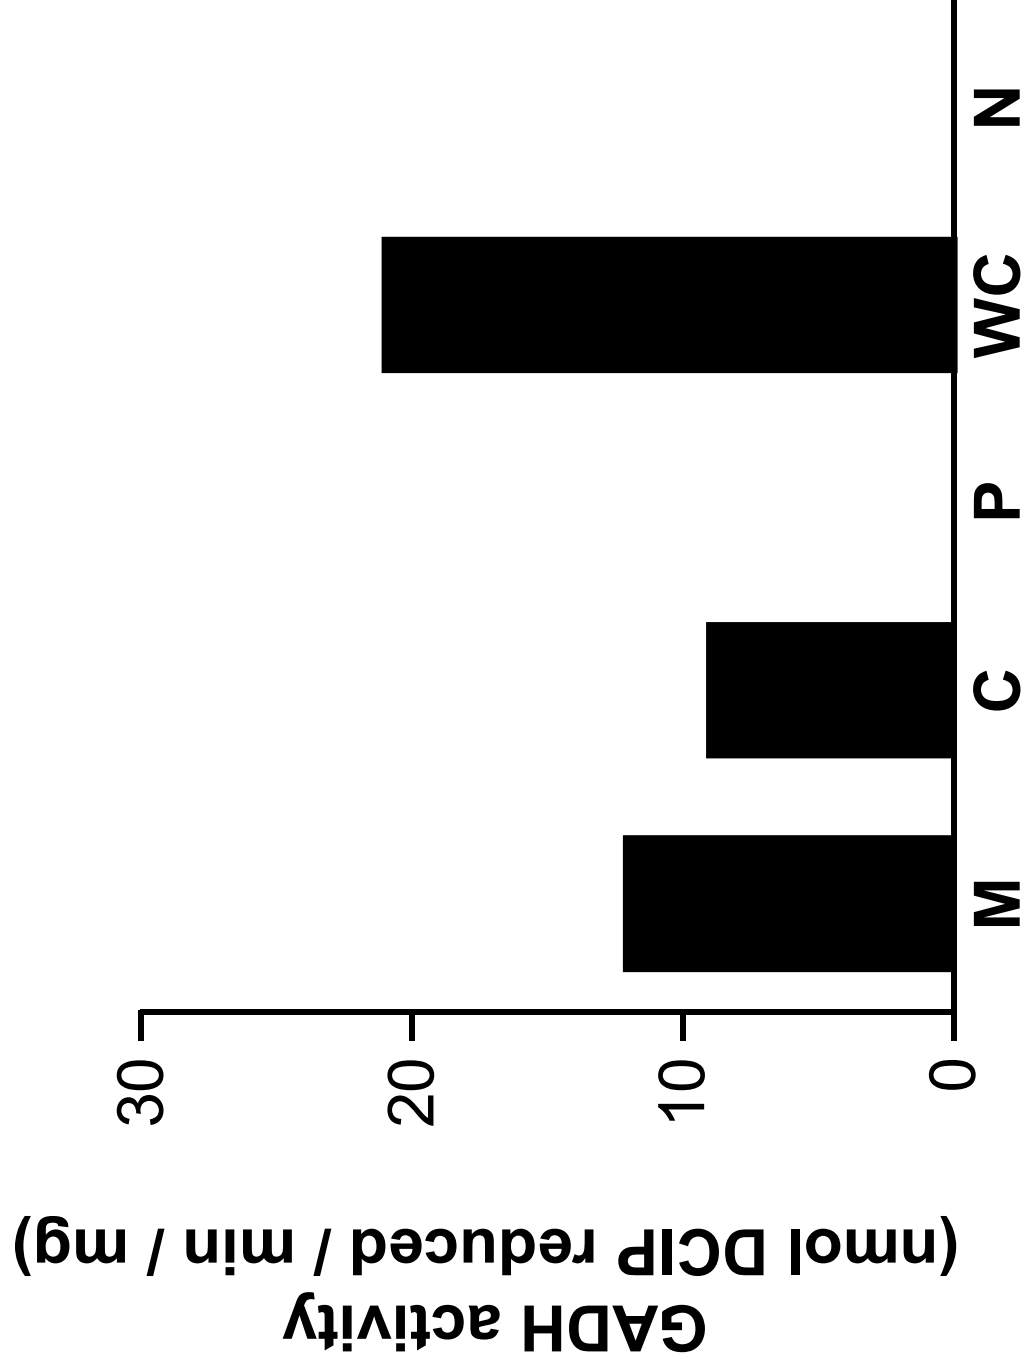

Figure S3

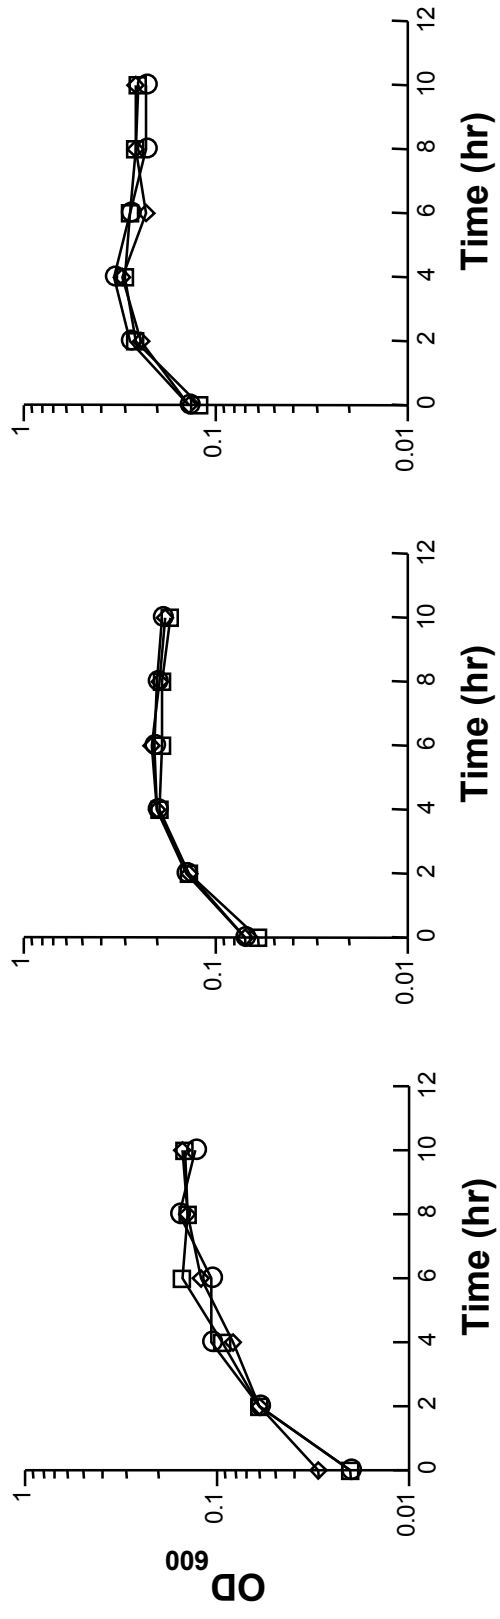

Figure S4

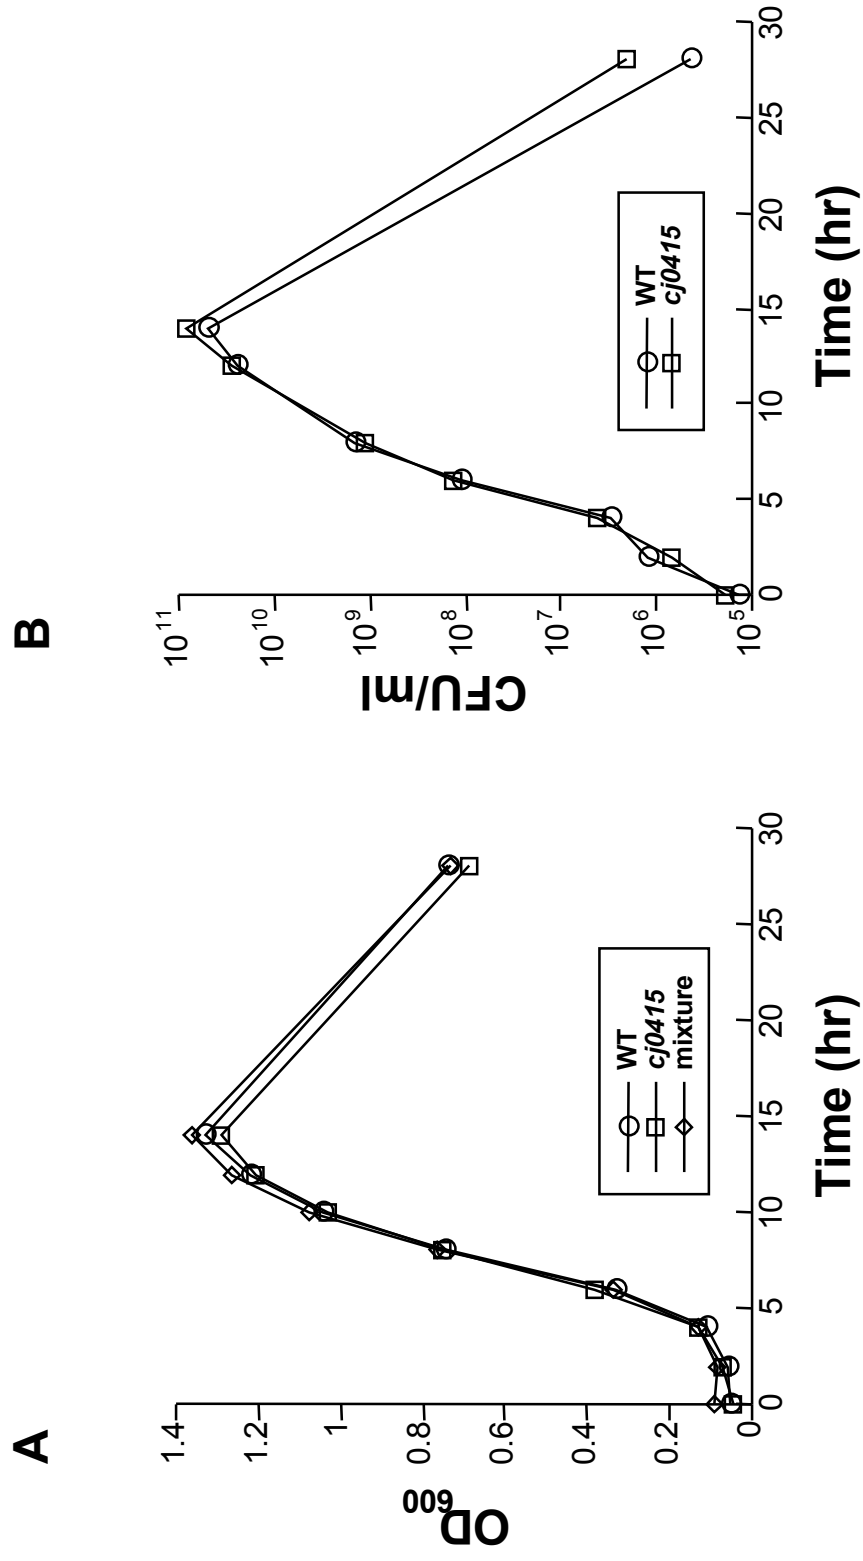

**TABLE S1.** Primers used in this study

| <b>Primer</b>         | <b>Sequence (5' → 3')<sup>†</sup></b>         | <b>Coordinates*</b> |
|-----------------------|-----------------------------------------------|---------------------|
| <i>cj0414</i> -F1     | AA <u>ACTGCAGAT</u> GCAAGACAATATTATTGATC      | 380937-380958       |
| <i>cj0415</i> -F1     | TGGCTGCAGAGCTTACTAAAGCAGGTT                   | 381740-381757       |
| <i>cj0415</i> -R1     | CCCGT <u>CGACT</u> TTTTCCACTTTTATGATATTT      | 383376-383356       |
| <i>cj0413</i> -F1     | AAAAAGATGGACAAATGGCC                          | 380482-380501       |
| <i>cj0417</i> -R1     | ACGATGACTTGAATTTGCAT                          | 383712-383693       |
| <i>cj0414</i> -inv1   | AA <u>ACCGGT</u> AGCAGATATGGAGAGTTAAA         | 381647-381666       |
| <i>cj0414</i> -inv2   | AAAA <u>ACCGGTGCTAGC</u> AGCCTTGTTCCGGCTTTGCC | 381263-381282       |
| <i>cat</i> -Nhe       | CTCT <u>GCTAGC</u> GGAGGATAAATGATGCAATT       | N/A                 |
| <i>cat</i> -Age       | AGAG <u>ACCGGTTT</u> ATTTATTCAGCAAGTCTT       | N/A                 |
| <i>cj0414</i> -F2     | AAACTGCAGATGCAAGACAATATTATTGATC               | 380937-380959       |
| <i>cj0415</i> -R2     | CCCGT <u>CGACT</u> TTTTCCACTTTTATGATATTTT     | 383376-383354       |
| 16S-RT-FOR            | GGGTGCTAGTCATCTCAGTAATGC                      | 40161-40187         |
| 16S-RT-REV            | GGTAAGGTTCTTCGCGTATCTTCG                      | 40210-40176         |
| <i>cj0414</i> -RT-FOR | GGAGAAGGAGCTATAGGTTTAGGC                      | 381177-381201       |
| <i>cj0414</i> -RT-REV | GCGTTGCATAGGAGTTTGATAGCC                      | 381322-381298       |
| <i>cj0415</i> -RT-FOR | GTGGCTGCAGAGCTTACTAAAGCA                      | 381730-381753       |
| <i>cj0415</i> -RT-REV | GCTAAACCACTAGGATCATGGCGA                      | 381908-381885       |

<sup>†</sup>Underlined nucleotides indicate restriction sites introduced for cloning purposes

\*According to NCTC11168 genomic sequence (accession AL111168)

N/A - Not applicable
